# Supplementary material for: Study protocol of a cluster randomized controlled trial to evaluate effectiveness of a system for maintaining high-quality early essential newborn care in Lao PDR
Source: Springer Nature journal article supplement (doi:10.1186/s12913-018-3311-7), 2018-06-25
Supplement: MOESM3 [file 15878382]

Additional file 3: Written test

Participant's name:..... District\_\_\_\_\_

Date:.....

*Choose the single best answer for each question*

1. Which of the following is the correct statement for preparation prior to delivery?

- a. Ensure room temperature of 18°C
- b. Turn on fan and air-conditioning
- c. Open a window
- d. Place dry cloth on mother's abdomen

2. Delivering in the supine position during second stage of labour is best.

- a. True
- b. False

3. Applying fundal pressure (pushing down on the top of the uterus) is an effective means of supporting labour.

- a. True
- b. False

4. After a baby is born, you should call out the time of birth (accurate to minute and second), then what?

- a. Clamp and cut the cord.
- b. Thoroughly dry the baby.
- c. Suction the baby's mouth and nose.
- d. Hold the baby upside-down to let out the secretions.

5. What is correct statement for thorough drying
- a. Use a clean, dry cloth for wiping the baby
  - b. Start wiping from arms and legs of the baby
  - c. Wrap a baby with towels after drying to keep the baby warm.
  - d. All of the above.
6. During thorough drying and stimulation of the baby, your rapid assessment shows she is crying. What is your next action?
- a. Suction the baby's mouth and nose.
  - b. Clamp and cut the cord.
  - c. Place the baby in skin-to-skin contact with the mother.
  - d. Place the baby onto the breast.
7. For which reason(s) should the baby's mouth and nose be suctioned after thorough drying?
- a. The baby is breathing and the amniotic fluid is thickly stained with meconium and the baby is covered in meconium.
  - b. The baby is not breathing and the amniotic fluid is thickly stained with meconium and the baby is covered in meconium.
  - c. The baby is not breathing and there is no airway obstruction visible.
  - d. All of the above.
8. What is the approximate capacity of a newborn's stomach? Circle A, B, C or D.

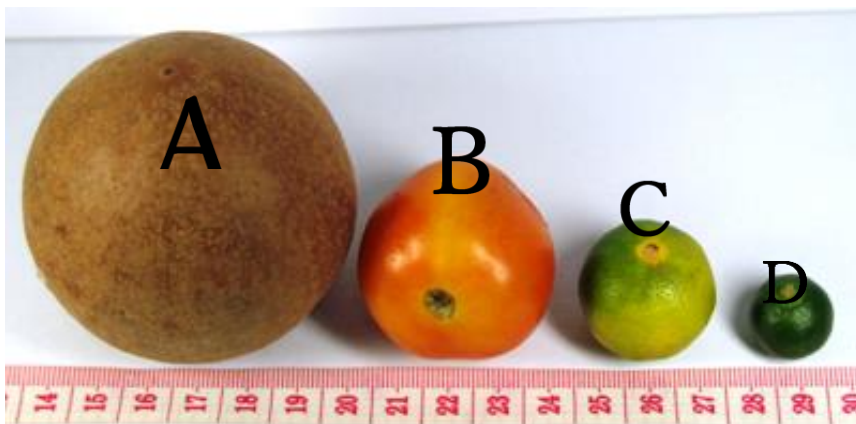

9. Which is the correct statements for skin- to-skin?

- a. Place the baby prone on the mother's abdomen or chest.
- b. Cover the baby and mother with a clean warm cloth and head with a bonnet.
- c. Do not separate the baby from the mother as long as the baby is well.
- d. All of the above.

10. At least how long skin-to-skin should be continued after birth?

.....

11. List 3 situations when skin-to-skin can be interrupted.

.....

.....

12. What is your next action after placing the baby in skin-to-skin contact with the mother when the baby is doing well?

- a. Examine the baby and provide eye care.
- b. Encourage breastfeeding.
- c. Bath the baby.
- d. Inject oxytocin after excluding a second baby and check cord pulsations

13. Which is the correct statements for cord clamping and cutting if the baby is breathing?

- a. Clamp the cord immediately after birth of the baby.
- b. Clamp the cord after cord pulsations have stopped.
- c. Do not change gloves before handling the cord if you are lone birth attendant.
- d. All of the above.

14. Choose the correct length between the first clamping site and the umbilical base.

- a. 1cm
- b. 2cm
- c. 5cm
- d. None of the above

15. A baby has feeding cues indicating she is ready to breastfeed immediately after birth.

- a. True
- b. False

16. List 3 signs a newborn baby is ready to breastfeed (“feeding cues”).

.....

.....

17. List 3 signs a baby has good attachment to the breast.

.....

.....

18. List 3 things you should do to improve bag-and-mask ventilation.

.....

.....

19. When does a baby need bag-and-mask ventilation? After thorough drying for 30 seconds, the baby is:

- a. Not breathing.
- b. Having difficulty breathing (gasping respirations).
- c. Breathing but limp and very pale or blue in colour.
- d. All of the above.

20. A baby required bag-and-mask ventilation for 2 minutes. You have stopped bag-and-mask ventilation. He is now crying, breathing without difficulty, pink, and the heart rate is > 100 beats per minute.

What should you do now?

- a. Place the baby in direct skin-to-skin contact with the mother/do routine newborn care.
- b. Move the baby to an observational area and monitor breathing every 10 minutes.
- c. Give oxygen by nasal cannula or mask.
- d. Do all of the above.
